# Supplementary material
Source: PubMed Central journal article supplement (PMC4769188)
Supplement: ASN.2014101051_ASN2014101051SupplementaryData.pdf [file ASN.2014101051_ASN2014101051SupplementaryData.pdf]

## Supplementary Table 1 : causal mutations identified in index cases.

### (a) Familial cases: mutations identified in the affected parents

#### Definitively pathogenic mutations

| Case # | Gene        | Exon/<br>Intron | Nucleotide change               | Effect on Protein | Mutation type       | Reference    |
|--------|-------------|-----------------|---------------------------------|-------------------|---------------------|--------------|
| 3      | <i>PKDI</i> | 1 to 5          | c.1-?_1201+?del ( <i>PKDI</i> ) |                   | large rearrangement | This study   |
| 13     | <i>PKDI</i> | 5               | c.1010_1013dup                  |                   | frameshift          | This study   |
| 29     | <i>PKDI</i> | 11              | c.2582G>A                       | p.Trp861*         | nonsense            | <sup>1</sup> |
| 17     | <i>PKDI</i> | 11              | c.2833_2834del                  |                   | frameshift          | <sup>1</sup> |
| 20     | <i>PKDI</i> | 14              | c.3202del                       |                   | frameshift          | This study   |
| 1      | <i>PKDI</i> | 15              | c.4804del                       |                   | frameshift          | This study   |
| 22     | <i>PKDI</i> | 15              | c.5764C>T                       | p.Gln1922*        | nonsense            | <sup>2</sup> |
| 31     | <i>PKDI</i> | 15              | c.5873G>A                       | p.Trp1958*        | nonsense            | This study   |
| 7      | <i>PKDI</i> | 15              | c.6472C>T                       | p.Gln2158*        | nonsense            | <sup>3</sup> |
| 35     | <i>PKDI</i> | 15              | c.6472C>T                       | p.Gln2158*        | nonsense            | <sup>3</sup> |
| 18     | <i>PKDI</i> | 15              | c.6548_6551del                  | p.Thr2183Serfs*28 | frameshift          | This study   |
| 39     | <i>PKDI</i> | 15              | c.6727_6730del                  | p.Gln2243Alafs*6  | frameshift          | <sup>1</sup> |
| 34     | <i>PKDI</i> | 25              | c.8998del                       | p.Arg3000Alafs*74 | frameshift          | This study   |
| 16     | <i>PKDI</i> | 25              | c.9089_9096del                  | p.Leu3030Profs*36 | frameshift          | This study   |
| 42     | <i>PKDI</i> | 33              | c.10232G>A                      | p.Trp3411*        | nonsense            | This study   |
| 40     | <i>PKDI</i> | 33              | c.10343del                      | p.Pro3448Glnfs*25 | frameshift          | <sup>1</sup> |
| 41     | <i>PKDI</i> | 33              | c.10343del                      | p.Pro3448Glnfs*25 | frameshift          | <sup>1</sup> |
| 28     | <i>PKDI</i> | 41              | c.11538-2A>G                    |                   | splicing            | <sup>1</sup> |
| 27     | <i>PKDI</i> | 42              | c.11713-2A>G                    |                   | splicing            | This study   |
| 38     | <i>PKDI</i> | 42              | c.11614G>T                      | p.Glu3872*        | nonsense            | <sup>3</sup> |
| 32     | <i>PKDI</i> | 43              | c.11884C>T                      | p.Gln3962*        | nonsense            | This study   |
| 26     | <i>PKDI</i> | 43              | c.12003+1G>A                    |                   | splicing            | <sup>1</sup> |
| 25     | <i>PKDI</i> | 45              | c.12440dup                      | p.Glu4148Glyfs*9  | frameshift          | This study   |
| 14     | <i>PKDI</i> | 46              | c.12503dup                      | p.Ser4169Leufs*41 | frameshift          | This study   |

#### Highly likely pathogenic missense mutations

| Case # | Gene        | Nucleotide change | Effect on protein | Position on PC-1 orthologs | Exon | Grantham Distance | Align | Polyphen |                           | SIFT        |            | Mutation Taster |            | Remarks                                 | Reference    |
|--------|-------------|-------------------|-------------------|----------------------------|------|-------------------|-------|----------|---------------------------|-------------|------------|-----------------|------------|-----------------------------------------|--------------|
|        |             |                   |                   |                            |      |                   | GVGD  | Class    | Prediction <sup>(a)</sup> | Score       | Prediction | Score           | Prediction |                                         |              |
| 37     | <i>PKDI</i> | c.689G>C          | p.Cys230Ser       | Invariant                  | 5    | 112               | C0    | B        | 0.99                      | Deleterious | 0          | Disease causing | 0.995      | Highly Likely pathogenic <sup>(b)</sup> | <sup>2</sup> |
| 6      | <i>PKDI</i> | c.2180T>C         | p.Leu727Pro       | Invariant                  | 11   | 98                | C65   | PD       | 1                         | Deleterious | 0.01       | Disease causing | 1          | Highly Likely pathogenic <sup>(b)</sup> | <sup>2</sup> |
| 8      | <i>PKDI</i> | c.7108T>A         | p.Cys2370Ser      | Invariant                  | 17   | 112               | C0    | PD       | 1                         | Deleterious | 0          | Disease causing | 1          | Highly Likely pathogenic <sup>(b)</sup> | <sup>2</sup> |
| 36     | <i>PKDI</i> | c.7115C>G         | p.Ser2372Cys      | Invariant                  | 17   | 112               | C65   | PD       | 1                         | Deleterious | 0          | Disease causing | 1          | Likely pathogenic <sup>(b)</sup>        | <sup>1</sup> |

(a) PD : Probably damaging, PoD : Possibly damaging, B : Benign; (b) pkdb.mayo.edu/

## Likely pathogenic missense mutations

| Case # | Gene        | Nucleotide change | Effect on protein | Position on PC-1 orthologs | Exon | Grantham Distance | Align | Polyphen |                           | SIFT        |            | Mutation Taster |            | Remarks                                 | Reference  |
|--------|-------------|-------------------|-------------------|----------------------------|------|-------------------|-------|----------|---------------------------|-------------|------------|-----------------|------------|-----------------------------------------|------------|
|        |             |                   |                   |                            |      |                   | GVGD  | Class    | Prediction <sup>(a)</sup> | Score       | Prediction | Score           | Prediction |                                         |            |
| 21     | <i>PKD1</i> | c.5517G>T         | p.Trp1839Cys      | Invariant                  | 15   | 215               | C0    | PD       | 1                         | Deleterious | 0          | Disease causing | 1          |                                         | This study |
| 19     | <i>PKD1</i> | c.7978G>T         | p.Asp2660Tyr      | Invariant                  | 21   | 160               | C15   | PD       | 1                         | Deleterious | 0.01       | Disease causing | 1          |                                         | This study |
| 24     | <i>PKD1</i> | c.8497C>T         | p.Pro2833Ser      | Invariant                  | 23   | 74                | C65   | PD       | 1                         | Deleterious | 0          | Disease causing | 1          |                                         | This study |
| 23     | <i>PKD1</i> | c.9562A>G         | p.Asn3188Asp      | Invariant                  | 27   | 23                | C15   | PD       | 1                         | Deleterious | 0          | Disease causing | 1          |                                         | This study |
| 12     | <i>PKD1</i> | c.9563A>T         | p.Asn3188Ile      | Invariant                  | 27   | 149               | C65   | PD       | 1                         | Deleterious | 0          | Disease causing | 1          |                                         | This study |
| 11     | <i>PKD1</i> | c.11969T>G        | p.Leu3990Arg      | Invariant                  | 43   | 102               | C65   | PD       | 1                         | Deleterious | 0.01       | Disease causing | 0.966      |                                         | This study |
| 2      | <i>PKD2</i> | c.964C>G          | p.Arg322Gly       |                            | 4    | 125               | C65   | PD       | 0.999                     | Deleterious | 0          | Disease causing | 1          | Highly Likely pathogenic <sup>(b)</sup> | 4          |
| 15     | <i>PKD2</i> | c.974G>C          | p.Arg325Pro       |                            | 4    | 103               | C35   | PD       | 0.993                     | Deleterious | 0.02       | Disease causing | 0.998      |                                         | This study |

(a) PD : Probably damaging, PoD : Possibly damaging, B : Benign; (b) pkdb.mayo.edu/

## Likely pathogenic other mutations

| Case # | Gene        | Exon/ Intron | Nucleotide change | Effect on Protein | Mutation type           | Position on PC-1 orthologs | Reference  |
|--------|-------------|--------------|-------------------|-------------------|-------------------------|----------------------------|------------|
| 33     | <i>PKD1</i> | 21           | c.8017-3C>G       |                   | Splicing <sup>(c)</sup> |                            | This study |
| 10     | <i>PKD1</i> | 27           | c.9568G>A         |                   | Splicing <sup>(d)</sup> |                            | This study |
| 30     | <i>PKD1</i> | 41           | c.11451_11453dup  | p.Gly3818dup      | indel in frame          |                            | This study |

## (b) sporadic cases : *de novo* mutations

| Case # | Gene        | Nucleotide change | Effect on protein | Position on PC-1 orthologs | Exon | Grantham Distance | Align | Polyphen |                           | SIFT        |            | Mutation Taster |            | Remarks                                 | Reference  |
|--------|-------------|-------------------|-------------------|----------------------------|------|-------------------|-------|----------|---------------------------|-------------|------------|-----------------|------------|-----------------------------------------|------------|
|        |             |                   |                   |                            |      |                   | GVGD  | Class    | Prediction <sup>(a)</sup> | Score       | Prediction | Score           | Prediction |                                         |            |
| 4      | <i>PKD1</i> | c.2534T>C         | p.Leu845Ser       | Invariant                  | 11   | 145               | C65   | PD       | 1                         | Deleterious | 0.01       | Disease causing | 0.997      | Highly Likely pathogenic <sup>(b)</sup> | 5          |
| 9      | <i>PKD1</i> | c.8536A>C         | p.Thr2846Pro      | Invariant                  | 23   | 38                | C35   | PD       | 1                         | Deleterious | 0          | Disease causing | 1          |                                         | This study |

(a) PD : Probably damaging, PoD : Possibly damaging, B : Benign; (b) pkdb.mayo.edu/ (c): acceptor splice site of intron 21 is shifted 2 bp upstream with a score of 78.3 (SpliceSiteFinder-like); (d) score of donor splice site of intron 27 is greatly reduced (from 79.6 to zero according to SpliceSiteFinder-like)

**Supplementary Table 2 : Missense *PKDI* variations identified in families, inherited from an unaffected parent, in addition to the causal mutation**

| Case # | Nucleotide change | Effect on protein           | Position on PC-1 orthologs | Exon | Grantham Distance | Align GVGD |                           | Polyphen |             | SIFT  |                 | Mutation Taster |                                                              | Remarks    | Reference |
|--------|-------------------|-----------------------------|----------------------------|------|-------------------|------------|---------------------------|----------|-------------|-------|-----------------|-----------------|--------------------------------------------------------------|------------|-----------|
|        |                   |                             |                            |      |                   | Class      | Prediction <sup>(a)</sup> | Score    | Prediction  | Score | Prediction      | Probability     |                                                              |            |           |
| 18     | c.3994G>A         | p.Asp1332Asn                | Highly conserved           | 15   | 23                | C15        | PD                        | 0.985    | Deleterious | 0     | Disease causing | 1               | LikelyNeutral <sup>(d)</sup>                                 | 6          |           |
| 39     | c.4031C>T         | p.Thr1344Met <sup>(b)</sup> | Highly conserved           | 15   | 81                | C0         | PD                        | 0.964    | Deleterious | 0.01  | Polymorphism    | 1               | rs185685883<br>(MAF 0.002/4)                                 | This study |           |
| 14     | c.4831G>A         | p.Val1161Ile                | Invariant                  | 15   | 29                | C25        | PD                        | 1        | Tolerated   | 0.17  | Disease causing | 1               |                                                              | This study |           |
| 21     | c.5830G>A         | p.Gly1944Arg                | Invariant                  | 15   | 125               | C0         | PD                        | 1        | Deleterious | 0     | Disease causing | 1               | rs200001471<br>(MAF 0.01%)                                   | This study |           |
| 23     | c.6173A>G         | p.Gln2058Arg                | Highly conserved           | 15   | 43                | C0         | PD                        | 0.999    | Deleterious | 0     | Disease causing | 1               |                                                              | This study |           |
| 13     | c.8129C>A         | p.Thr2710Asn <sup>(c)</sup> | Invariant                  | 22   | 65                | C15        | PD                        | 1        | Tolerated   | 0.28  | Disease causing | 1               | rs199700485                                                  | This study |           |
| 39     | c.8914G>A         | p.Asp2972Asn <sup>(b)</sup> | Invariant                  | 24   | 23                | C0         | PD                        | 1        | Deleterious | 0     | Disease causing | 1               | rs150189496 (MAF 0.03%)<br>Likely Neutral <sup>(d)</sup>     | 7          |           |
| 38     | c.9548G>A         | p.Arg3183Gln <sup>(c)</sup> | Invariant                  | 27   | 43                | C0         | PD                        | 1        | Deleterious | 0.05  | Disease causing | 1               | rs79648977<br>(MAF 0.001/3)<br>Likely Neutral <sup>(d)</sup> | 8          |           |
| 1      | c.9815G>A         | p.Arg3272His <sup>(c)</sup> | Invariant                  | 29   | 29                | C0         | PD                        | 1        | Deleterious | 0     | Disease causing | 1               |                                                              | This study |           |
| 3      | c.9829C>T         | p.Arg3277Cys <sup>(c)</sup> | Invariant                  | 29   | 180               | C15        | PD                        | 1        | Deleterious | 0.04  | Disease causing | 1               | Likely hypomorphic <sup>(d)</sup>                            | 9          |           |
| 42     | c.9884A>G         | p.Asn3295Ser                | Invariant                  | 29   | 46                | C0         | PD                        | 0.999    | Tolerated   | 0.43  | Disease causing | 0.999           | Indeterminate <sup>(d)</sup>                                 | 8          |           |
| 6      | c.11834C>T        | p.Thr3945Met                | Highly conserved           | 43   | 81                | C45        | PD                        | 1        | Deleterious | 0     | Disease causing | 0.959           |                                                              | This study |           |
| 29     | c.12074A>G        | p.Glu4025Gly                | Invariant                  | 44   | 98                | C0         | PD                        | 1        | Deleterious | 0.05  | Disease causing | 1               |                                                              | This Study |           |
| 19     | c.12161C>T        | p.Ser4054Phe <sup>(c)</sup> | Moderately conserved       | 45   | 155               | C15        | PD                        | 0.988    | Deleterious | 0.02  | Polymorphism    | 0.777           |                                                              | This study |           |
| 8      | c.12460C>T        | p.Arg4154Cys                | Invariant                  | 46   | 180               | C25        | PD                        | 1        | Deleterious | 0     | Disease causing | 1               | Likely Pathogenic <sup>(d)</sup>                             | 10         |           |
| 39     | c.12460C>T        | p.Arg4154Cys <sup>(b)</sup> | Invariant                  | 46   | 180               | C25        | PD                        | 1        | Deleterious | 0     | Disease causing | 1               | Likely Pathogenic <sup>(d)</sup>                             | 10         |           |
| 31     | c.12460C>T        | p.Arg4154Cys                | Invariant                  | 46   | 180               | C25        | PD                        | 1        | Deleterious | 0     | Disease causing | 1               | Likely Pathogenic <sup>(d)</sup>                             | 10         |           |

- (a) PD : Probably damaging, PoD : Possibly damaging, B : Benign; (b) These three variations were identified in the unaffected father of case #40, but segregation could not be studied; (c) These two variations were identified in two probands, but we can not know whether they were transmitted or appeared *de novo*, as DNA from the unaffected parent was unavailable. (d) [pkdb.mayo.edu/](http://pkdb.mayo.edu/) ; (e) variants found in our in house database



## REFERENCES

1. Audrezet, MP, Cornec-Le Gall, E, Chen, JM, Redon, S, Quere, I, Creff, J, Benech, C, Maestri, S, Le Meur, Y, Ferec, C: Autosomal dominant polycystic kidney disease: comprehensive mutation analysis of PKD1 and PKD2 in 700 unrelated patients. *Human mutation*, 33: 1239-1250, 2012.
2. Rossetti, S, Consugar, MB, Chapman, AB, Torres, VE, Guay-Woodford, LM, Grantham, JJ, Bennett, WM, Meyers, CM, Walker, DL, Bae, K, Zhang, QJ, Thompson, PA, Miller, JP, Harris, PC: Comprehensive molecular diagnostics in autosomal dominant polycystic kidney disease. *Journal of the American Society of Nephrology : JASN*, 18: 2143-2160, 2007.
3. Tan, YC, Blumenfeld, JD, Anghel, R, Donahue, S, Belenkaya, R, Balina, M, Parker, T, Levine, D, Leonard, DG, Rennert, H: Novel method for genomic analysis of PKD1 and PKD2 mutations in autosomal dominant polycystic kidney disease. *Human mutation*, 30: 264-273, 2009.
4. Peltola, P, Lumiaho, A, Miettinen, R, Pihlajamaki, J, Sandford, R, Laakso, M: Genetics and phenotypic characteristics of autosomal dominant polycystic kidney disease in Finns. *J Mol Med (Berl)*, 83: 638-646, 2005.
5. Thomas, R, McConnell, R, Whittacker, J, Kirkpatrick, P, Bradley, J, Sandford, R: Identification of mutations in the repeated part of the autosomal dominant polycystic kidney disease type 1 gene, PKD1, by long-range PCR. *American journal of human genetics*, 65: 39-49, 1999.
6. Rossetti, S, Hopp, K, Sikkink, RA, Sundsbak, JL, Lee, YK, Kubly, V, Eckloff, BW, Ward, CJ, Winearls, CG, Torres, VE, Harris, PC: Identification of Gene Mutations in Autosomal Dominant Polycystic Kidney Disease through Targeted Resequencing. *Journal of the American Society of Nephrology : JASN*, 2012.
7. Bouba, I, Koptides, M, Mean, R, Costi, CE, Demetriou, K, Georgiou, I, Pierides, A, Siamopoulos, K, Deltas, CC: Novel PKD1 deletions and missense variants in a cohort of Hellenic polycystic kidney disease families. *European journal of human genetics : EJHG*, 9: 677-684, 2001.
8. Yu, C, Yang, Y, Zou, L, Hu, Z, Li, J, Liu, Y, Ma, Y, Ma, M, Su, D, Zhang, S: Identification of novel mutations in Chinese Hans with autosomal dominant polycystic kidney disease. *BMC medical genetics*, 12: 164, 2011.
9. Rossetti, S, Kubly, VJ, Consugar, MB, Hopp, K, Roy, S, Horsley, SW, Chauveau, D, Rees, L, Barratt, TM, van't Hoff, WG, Niaudet, P, Torres, VE, Harris, PC: Incompletely penetrant PKD1 alleles suggest a role for gene dosage in cyst initiation in polycystic kidney disease. *Kidney international*, 75: 848-855, 2009.
10. Perrichot, RA, Mercier, B, Simon, PM, Whebe, B, Cledes, J, Ferec, C: DGGE screening of PKD1 gene reveals novel mutations in a large cohort of 146 unrelated patients. *Human genetics*, 105: 231-239, 1999.

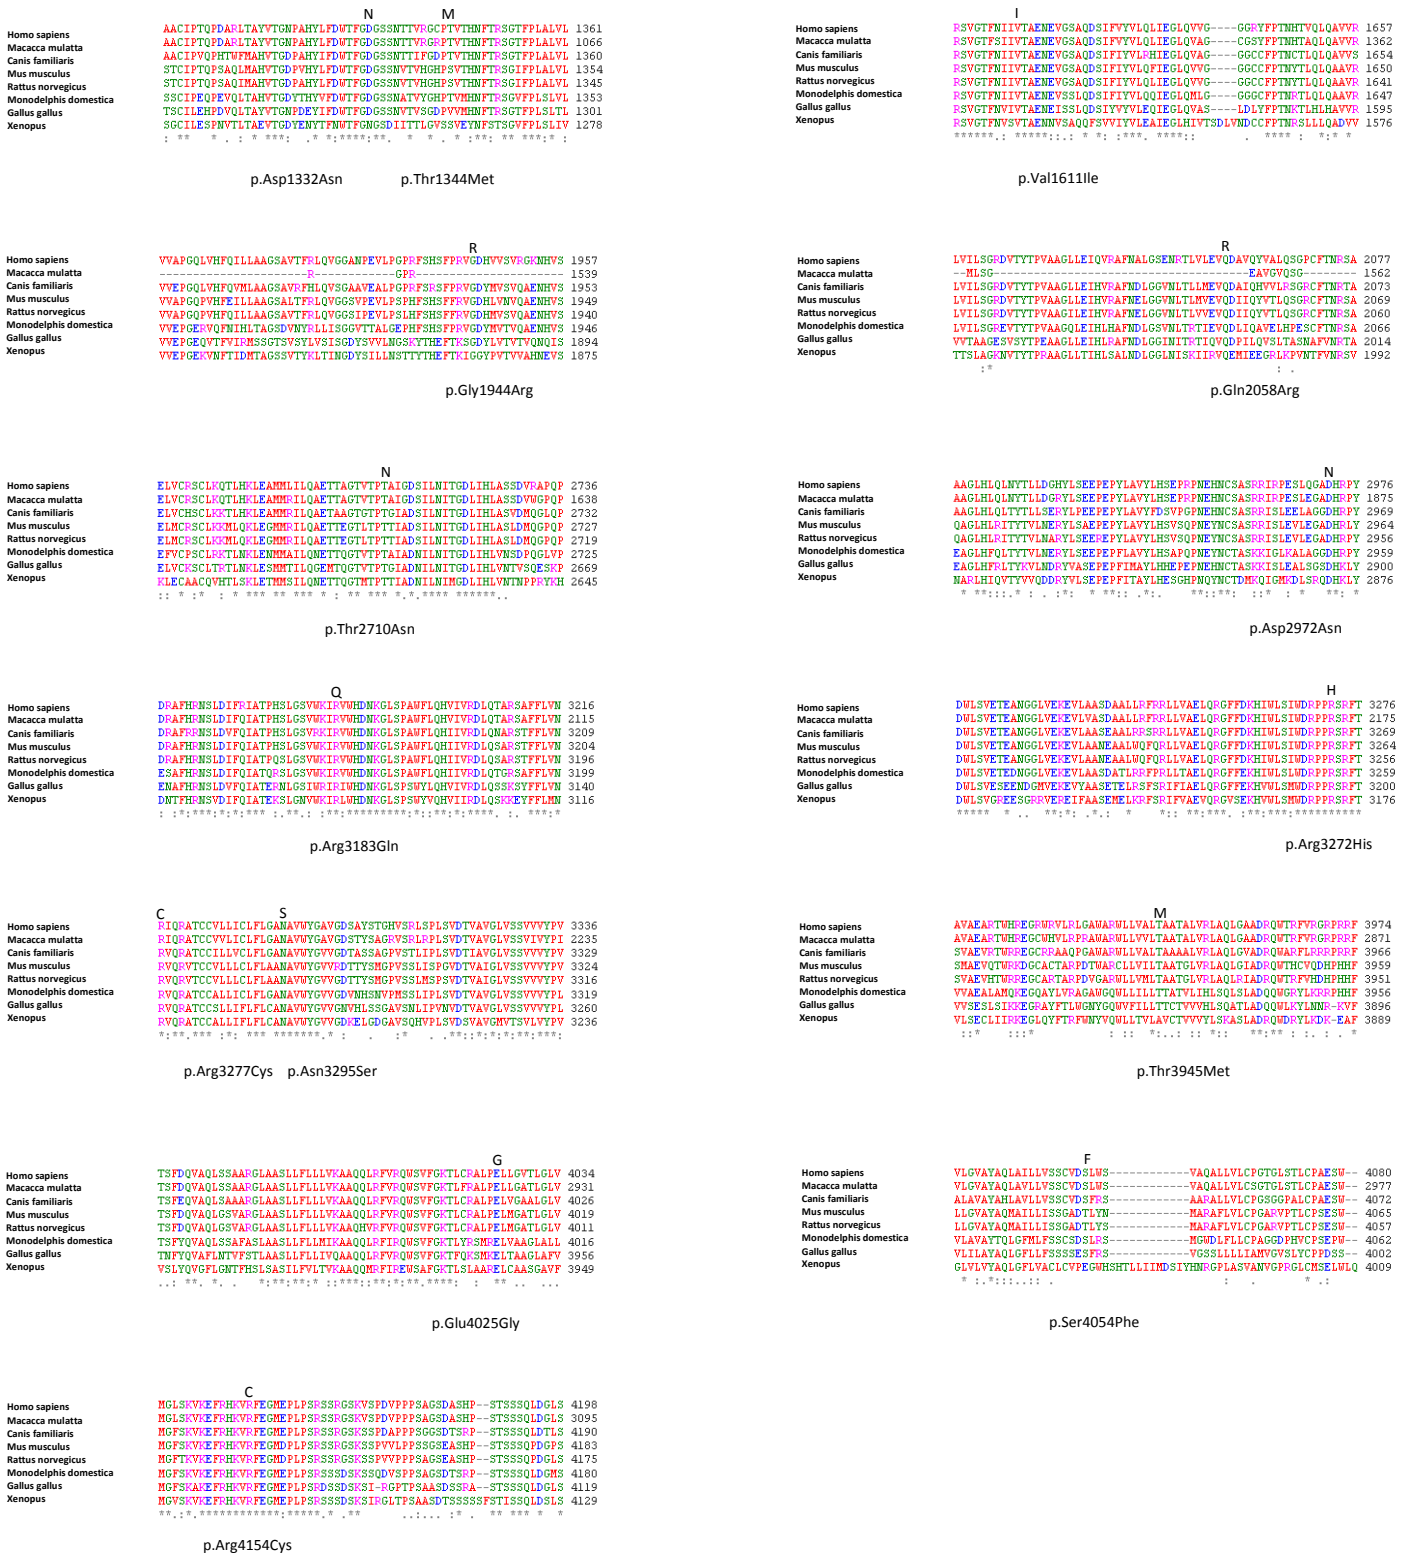

Supplementary Figure : multiple sequence alignments at the positions of the identified additional variations
